# Supplementary material
Source: PubMed Central journal article supplement (PMC8713690)
Supplement: boe-12-12-7790-s001.pdf [file boe-12-12-7790-s001.pdf]

## Deep learning-based method for the continuous detection of heart rate in signals from a multi-fiber Bragg grating sensor compatible with magnetic resonance imaging: supplement

MARIUSZ KREJ,<sup>1</sup> TOMASZ OSUCH,<sup>2,3</sup>  ALICJA ANUSZKIEWICZ,<sup>2,4</sup>  STANISŁAW STOPINSKI,<sup>5</sup> KRZYSZTOF ANDERS,<sup>5</sup>  KRZYSZTOF MATUK,<sup>6</sup> ANDRZEJ WEIGL,<sup>6</sup> EUGENIUSZ TARASOW,<sup>6,7</sup> RYSZARD PIRAMIDOWICZ,<sup>5</sup> AND LUKASZ DZIUDA<sup>1,\*</sup> 

<sup>1</sup>Military Institute of Aviation Medicine, Department of Psychophysiological Measurements and Human Factor Research, Krasinskiego 54/56, 01-755 Warsaw, Poland

<sup>2</sup>Warsaw University of Technology, Faculty of Electronics and Information Technology, Institute of Electronic Systems, Warsaw University of Technology, Nowowiejska 15/19, 00-665 Warsaw, Poland

<sup>3</sup>National Institute of Telecommunications, Szachowa 1, 04-894 Warsaw, Poland

<sup>4</sup>Lukasiewicz Research Network - Institute of Microelectronics and Photonics, Photonic Materials Group, al. Lotnikow 32/46, 02-668 Warsaw, Poland

<sup>5</sup>Warsaw University of Technology, Faculty of Electronics and Information Technology, Institute of Microelectronics and Optoelectronics, Koszykowa 75, 00-662 Warsaw, Poland

<sup>6</sup>TMS Diagnostyka Sp. z o.o., Wiermicza 84, 02-952 Warsaw, Poland

<sup>7</sup>Medical University of Białystok, Faculty of Medicine, Department of Radiology, Kilinskiego 1, 15-089 Białystok, Poland

\*[ldziuda@wiml.waw.pl](mailto:ldziuda@wiml.waw.pl)

---

This supplement published with Optica Publishing Group on 24 November 2021 by The Authors under the terms of the [Creative Commons Attribution 4.0 License](https://creativecommons.org/licenses/by/4.0/) in the format provided by the authors and unedited. Further distribution of this work must maintain attribution to the author(s) and the published article's title, journal citation, and DOI.

Supplement DOI: <https://doi.org/10.6084/m9.figshare.16900219>

Parent Article DOI: <https://doi.org/10.1364/BOE.441932>

# Deep learning-based method for the continuous detection of heart rate in signals from a multi-fiber Bragg grating sensor compatible with magnetic resonance imaging: supplemental document

The source code for data preparation, neural network learning, and HR detection method software available at GitHub contains the following repositories:

- <https://github.com/mkkmod/TCN/>  
TCN code forked from [github.com/locuslab/TCN](https://github.com/locuslab/TCN) adapted to interoperate with ONNX
- <https://github.com/mkkmod/OptoSigNN/>  
Python code for learning TCN as the signal aggregator for the method of continuous HR detection in signals from the multi-FBG sensor
- <https://github.com/mkkmod/OptoHrSrcSigQuality/>  
R language scripts used to create the learning set to learn the signal aggregator, which is a component of the method of continuous HR detection in signals from the multi-FBG sensor
- <https://github.com/mkkmod/SasDspExts/>  
C# language code of the method of continuous HR detection in signals from the multi-FBG sensor
